# Supplementary material
Source: publisher site journal article supplement (https://www.spandidos-publications.com/3255/downloadSupplementary)
Supplement: Supplementary file 1 [file downloadSupplementary]

Figure S1. Associations between target gene expression and overall survival of all patients with CRC. (A) Gene expression levels were divided by the cutoff calculated using the Receiver operator curve analysis. (B) Kaplan-Meier survival curves were plotted for patients divided into groups by the cutoff/Blue line represents the group with lower expression and green line the group with higher expression level than the cutoff. PRC1, protein regulating cytokinesis 1; KIF14, kinesin family member 14; CIT, citron Rho-interacting serine/threonine kinase; CRC, colorectal cancer; AUC, area under curve; FPR, false positive rate; TPR, true positive rate.

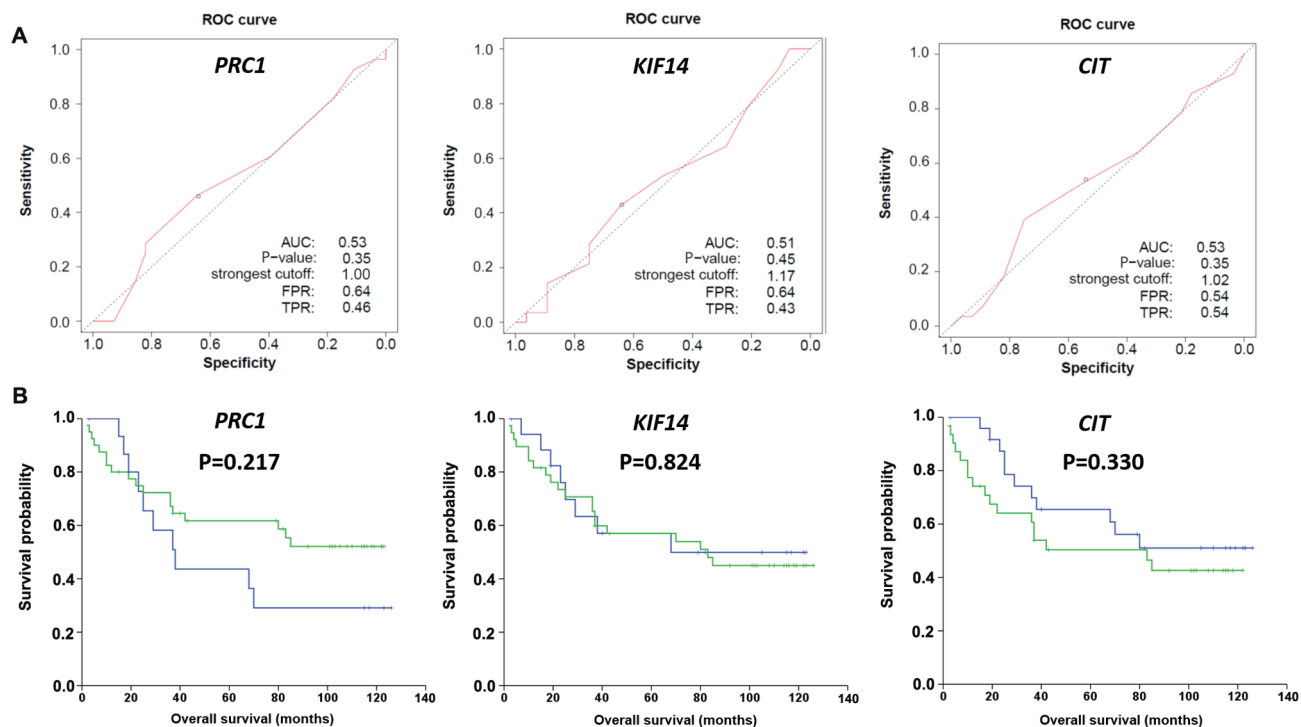

Figure S2. Associations between target gene expression and overall survival of patients with PDAC. Kaplan-Meier survival curves were plotted for patients divided into groups above and below median expression of target genes. Blue line represents the group with lower expression and green line the group with higher expression levels than median. (A) All patients and (B) patients treated with chemotherapy were presented. PRC1, protein regulating cytokinesis 1; KIF14, kinesin family member 14; CIT, citron Rho-interacting serine/threonine kinase; PDAC, pancreatic adenocarcinoma.

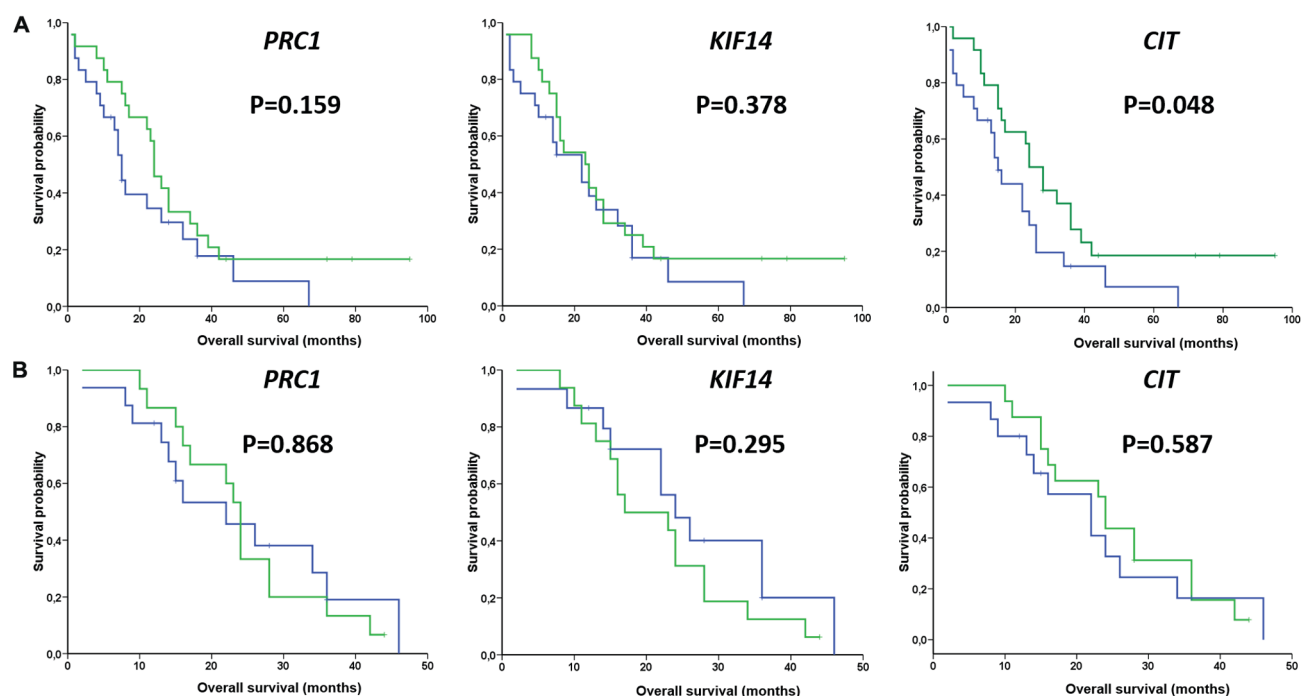

Figure S3. Associations between target gene expression and overall survival of all patients with PDAC. (A) Gene expression levels were divided by the cutoff calculated using the Receiver operator curve analysis. (B) Kaplan-Meier survival curves were plotted for patients divided into groups by the cutoff. Blue line represents the group with lower and green line the group with higher expression levels than the cutoff. PRC1, protein regulating cytokinesis 1; KIF14, kinesin family member 14; CIT, citron Rho-interacting serine/threonine kinase; PDAC, pancreatic adenocarcinoma; AUC, area under curve; FPR, false positive rate; TPR, true positive rate.

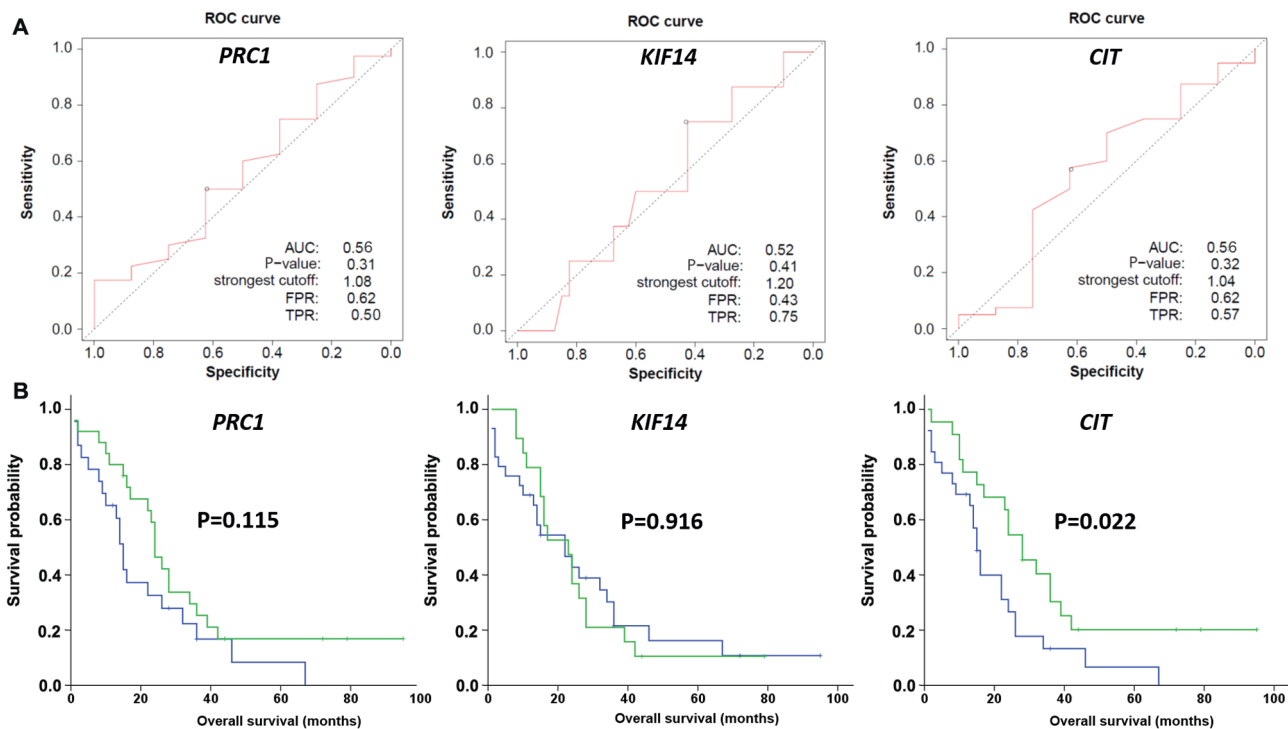

Table SI. Gene expression assays used in the study.

| Type of genes       | Gene symbol | Assay ID      | NCBI gene ID | Gene name                                           | Amplicon length (bp) |
|---------------------|-------------|---------------|--------------|-----------------------------------------------------|----------------------|
| Reference genes-CRC | MRPL19      | Hs00608519_m1 | 9801         | Mitochondrial ribosomal protein L19                 | 72                   |
|                     | POLR2A      | Hs00172187_m1 | 5430         | Polymerase II, RNA, subunit A                       | 61                   |
|                     | PSMC4       | Hs00197826_m1 | 5704         | Proteasome 26S subunit, ATPase 4                    | 83                   |
| Reference gene-PDAC | EIF2B1      | Hs00426752_m1 | 1967         | Eukaryotic translation initiation factor 2B         | 75                   |
|                     | ELF1        | Hs00152844_m1 | 10209        | Eukaryotic translation initiation factor 1          | 76                   |
|                     | MRPL19      | Hs00608519_m1 | 9801         | Mitochondrial ribosomal protein L19                 | 72                   |
|                     | POP4        | Hs00198357_m1 | 10775        | POP4 homolog, ribonuclease P/MRP subunit            | 68                   |
| Target genes        | KIF14       | Hs00978216_m1 | 9928         | Kinesin family member 14                            | 119                  |
|                     | CIT         | Hs00392339_m1 | 11113        | Citron (rho-interacting, serin/threonine kinase 21) | 68                   |
|                     | PRC1        | Hs00187740_m1 | 9055         | Protein regulator of cytokinesis 1                  | 66                   |

CRC, colorectal cancer; PDAC, pancreatic adenocarcinoma.

Table SII. Protein expression data from The Human Protein Atlas.

| Protein | Name                                                 | Protein expression<br>in normal tissue                    | Cellular<br>localization           | Protein expression in<br>colorectal carcinoma      | Protein expression<br>in pancreatic<br>adenocarcinoma |
|---------|------------------------------------------------------|-----------------------------------------------------------|------------------------------------|----------------------------------------------------|-------------------------------------------------------|
| PRC1    | Protein regulator of<br>cytokinesis 1                | Colon-medium<br>Rectum-medium<br>Pancreas-medium          | Plasma membrane<br>and nucleoplasm | High to medium in<br>majority of samples<br>(n=10) | High to medium in all<br>studied samples (n=11)       |
| KIF14   | Kinesin family<br>Cytosol and<br>member 14           | Colon-NA<br>High to medium in<br>Rectum-NA<br>Pancreas-NA | High to medium in<br>midbody ring  | majority of samples<br>(n=11)                      | majority of samples<br>(n=9)                          |
| CIT     | Citron rho-interacting<br>serine/threonine<br>kinase | Colon-medium<br>Rectum-medium<br>Pancreas-ND              | Cytosol                            | ND in most samples<br>(n=10)                       | Medium to low in<br>majority of samples<br>(n=10)     |

NA, not available; ND, not detected.
